# Supplementary material
Source: PubMed Central journal article supplement (PMC4527029)
Supplement: CJN.09911014_CJN09911014SupplementaryData.pdf [file CJN.09911014_CJN09911014SupplementaryData.pdf]

## **Supplementary Material**

### **Biomarker Enhanced Risk Prediction for Adverse Outcomes in Critically Ill Patients Receiving Renal Replacement Therapy**

Francis Pike,<sup>1,2,3</sup> Raghavan Murugan,<sup>1,2</sup> Christopher Keener,<sup>1,2,3</sup> Paul M. Palevsky,<sup>1,2,4</sup> Anitha Vijayan,<sup>5</sup>

Mark Unruh,<sup>2,6</sup> Kevin Finkel,<sup>7</sup> Emil Paganini,<sup>8</sup> Xiaoyan Wen,<sup>1,2</sup>

John A. Kellum,<sup>1,2</sup>

for the

Biological Markers for Recovery of Kidney (BioMaRK) Study Investigators

**Table E1**  
**Characteristics of Participants in the ATN and**  
**BioMaRK Study Cohorts**

| Characteristic                                       | No. (%)            |                 |
|------------------------------------------------------|--------------------|-----------------|
|                                                      | BIOMARK<br>(N=817) | ATN<br>(N=1124) |
| Age, mean (yrs)                                      | 60 (15.4)          | 59.7 (15.3)     |
| Race                                                 |                    |                 |
| White                                                | 626 (76.6)         | 835 (74)        |
| Black                                                | 124 (15.2)         | 179 (16)        |
| Hispanic                                             | 49 (6)             | 77(7)           |
| Other                                                | 18 (2.2)           | 16 (3)          |
| Male                                                 | 567 (69.4)         | 793 (71)        |
| Chronic hypoxemia                                    | 80 (9.8)           | 107 (9.5)       |
| Liver disease                                        | 94 (11.5)          | 131 (11.7)      |
| Cardiovascular disease <sup>a</sup>                  | 309 (37.8)         | 411 (38.1)      |
| Malignancy <sup>b</sup>                              | 157 (19.2)         | 225 (20.0)      |
| Immunosuppressive therapy <sup>c</sup>               | 123 (15.1)         | 178 (15.8)      |
| Nephrotoxic AKI                                      | 198 (24.3)         | 286 (25)        |
| Sepsis                                               | 424 (52)           | 579 (52)        |
| Ischemic AKI                                         | 649 (79.5)         | 871 (77)        |
| Post-surgery at RRT Initiation                       | 433 (53.0)         | 558 (49.7)      |
| Heart rate (beats /min) <sup>d</sup>                 | 92 (19.2)          | 93 (19.4)       |
| Mean arterial pressure, mmHg (SD)                    | 74 (13.9)          | 74 (14.9)       |
| Urine volume (mL/day) <sup>d, (SD)</sup>             | 362 (543)          | 373 (563)       |
| Mechanical ventilation                               | 660 (80.8)         | 905 (80.6)      |
| Fio2 <sup>&gt;=60</sup> <sup>d</sup>                 | 282 (40.5)         | 406 (42.3)      |
| Arterial pH                                          | 7.3 (0.1)          | 7.3 (0.1)       |
| Arterial oxygen partial pressure (mmHg) <sup>d</sup> | 107 (45.1)         | 108 (51.4)      |
| Serum creatinine <sup>e</sup>                        | 1 (0.3)            | 1 (0.4)         |

**Table 1: Continued**

|                                         |            |            |
|-----------------------------------------|------------|------------|
| Serum bicarbonate (mmol/L) <sup>d</sup> | 22 (5.0)   | 21 (5.1)   |
| Serum phosphate (mg/dl) <sup>d</sup>    | 5 (2.0)    | 5 (2.1)    |
| Serum albumin (g/dl) <sup>d</sup>       | 2 (0.7)    | 2 (0.8)    |
| Total bilirubin (mg/dl) <sup>e</sup>    | 0.7 (1.2)  | 0.8 (1.2)  |
| INR <sup>d</sup>                        | 1.8 (0.9)  | 1.8 (1.6)  |
| Platelet count (k/ $\mu$ l)             | 139 (114)  | 138 (114)  |
| Charlson score without age              | 3 (2.4)    | 3 (2.5)    |
| Oliguria                                | 654 (80.1) | 877 (78)   |
| Apache II <sup>†</sup> score            | 26 (7.1)   | 26 (7.3)   |
| <b>Outcome at day 60</b>                |            |            |
| Mortality                               | 415 (50.8) | 591 (52.6) |
| Alive and independent from RRT          | 298 (36.5) | 398 (35.4) |

**Abbreviations:** INR, International Normalized Ratio; RRT, Renal Replacement Therapy; ICU, Intensive Care Unit; APACHE, Acute Physiology and Chronic Health Evaluation; AKI, acute kidney injury.

<sup>†</sup> Acute Physiology and Chronic Health Evaluation II<sup>6</sup> includes initial values of 12 routine physiologic measurements, age, and previous health status ranging from 0 to 71; An increasing score is closely correlated with the subsequent risk of hospital death. All continuous variables were reported as means and standard deviation (SD). Categorical variables were reported as frequencies and percentages.

<sup>a</sup>History of angina, documented myocardial infarction, or congestive heart failure

<sup>b</sup>Solid tumor with or without metastases, leukemia, or lymphoma

<sup>c</sup>Positive HIV status, AIDS, non-renal organ transplantation, or immunosuppressive therapy

<sup>d</sup>Within 24 hrs of RRT initiation

<sup>e</sup>Premorbid serum creatinine taken at screening

<sup>f</sup>Z transformed variable

Table E2

## Comparison of Imputed and Non-imputed Parameter Risk Estimates for ATN and BioMaRK

## Cohorts

| Parameter                                           | Imputed Estimate ATN (N=1125) | P value | Imputed Estimate BioMaRK (N=817) | P value | Non-imputed Estimate ATN (N=487) | P value | Non-imputed Estimate BioMaRK (N=368) | P value |
|-----------------------------------------------------|-------------------------------|---------|----------------------------------|---------|----------------------------------|---------|--------------------------------------|---------|
| Age                                                 | 0.04                          | <0.01   | 0.04                             | <0.001  | 0.04                             | <0.001  | 0.03                                 | <0.01   |
| Chronic hypoxemia                                   | 0.73                          | 0.07    | 0.62                             | 0.03    | 1.27                             | 0.00    | 1.11                                 | 0.01    |
| Cardiovascular disease                              | 0.27                          | 0.03    | 0.18                             | 0.36    | 0.01                             | 0.96    | 0.12                                 | 0.67    |
| Malignancy                                          | 0.99                          | <0.01   | 0.15                             | 0.48    | 0.37                             | 0.21    | 0.41                                 | 0.22    |
| Immunosuppressive Therapy                           | -0.44                         | 0.02    | -0.37                            | 0.13    | -0.43                            | 0.14    | -0.63                                | 0.06    |
| Ischemic AKI                                        | 0.16                          | <0.05   | -0.05                            | 0.81    | 0.40                             | 0.22    | -0.15                                | 0.67    |
| Post-surgery at RRT Initiation                      | -0.45                         | 0.08    | -0.39                            | 0.03    | -0.21                            | 0.36    | -0.14                                | 0.60    |
| Heart Rate                                          | 0.01                          | <0.03   | 0.01                             | 0.01    | 0.01                             | 0.02    | 0.01                                 | 0.03    |
| Mean arterial pressure                              | -0.02                         | <0.02   | -0.03                            | <0.001  | -0.02                            | 0.03    | -0.03                                | <0.02   |
| Urine Volume                                        | -0.14                         | 0.02    | -0.02                            | 0.11    | -0.03                            | 0.04    | -0.02                                | 0.21    |
| Mechanical Ventilation                              | 1.03                          | <0.01   | 1.02                             | <0.001  | 1.13                             | 0.01    | 1.18                                 | 0.01    |
| Fio2>=60                                            | 3.07                          | <0.01   | 0.42                             | 0.54    | 0.06                             | 0.95    | -0.03                                | 0.98    |
| Interaction of mechanical ventilation and Fio2 >=60 | -1.53                         | <0.01   | -0.10                            | 0.89    | 0.27                             | 0.79    | 0.24                                 | 0.81    |
| Arterial pH                                         | -2.64                         | 0.06    | -4.01                            | <0.001  | -2.66                            | 0.06    | -3.70                                | 0.02    |
| Arterial oxygen partial pressure                    | -0.66                         | <0.05   | -0.36                            | 0.12    | -0.14                            | 0.63    | -0.11                                | 0.74    |
| Serum Creatinine                                    | -0.18                         | 0.01    | -0.17                            | 0.51    | 0.11                             | 0.61    | 0.48                                 | 0.21    |
| Serum Bicarbonate                                   | -0.03                         | 0.02    | -0.01                            | 0.73    | -0.06                            | 0.02    | -0.01                                | 0.72    |
| Serum Phosphate                                     | 0.02                          | 0.05    | 0.03                             | 0.46    | -0.03                            | 0.61    | -0.04                                | 0.54    |
| Serum Albumin                                       | -0.34                         | 0.02    | -0.08                            | 0.53    | -0.11                            | 0.44    | -0.04                                | 0.81    |
| Total Bilirubin                                     | 0.36                          | <0.01   | 0.43                             | <0.001  | 0.37                             | 0.00    | 0.29                                 | <0.01   |
| INR                                                 | 0.54                          | 0.01    | 0.27                             | 0.29    | 0.38                             | 0.21    | 0.11                                 | 0.76    |
| Platelet Count                                      | -0.36                         | <0.01   | -0.43                            | <0.001  | -0.36                            | 0.02    | -0.44                                | 0.02    |

## Equation 1

### Finding the Optimal Biomarker Cutoff Value

Youden's Index is given as  $J = \text{Sensitivity} + \text{Specificity} - 1$ . The optimal biomarker cutoff is found by using the fitted probability  $p_{\max J}$ , associated with the maximum value of Youden's Index ( $J_{\max}$ ) from a univariate biomarker logistic model, along with the fitted intercept and slope as follows:

$$CUTOFF_{optimal} = \left( \frac{\log\left(\frac{p_{\max J}}{1 - p_{\max J}}\right) - \beta_{int}}{\beta_{slope}} \right)$$

Where  $\beta_{int}$  and  $\beta_{slope}$  are the fitted intercept and slope from a univariate logistic mortality or recovery model with a continuous biomarker as the only predictor.

$$\log\left(\frac{p}{1 - p}\right) = \beta_{int} + \beta_{slope} (\text{Marker})$$

eFigure 1

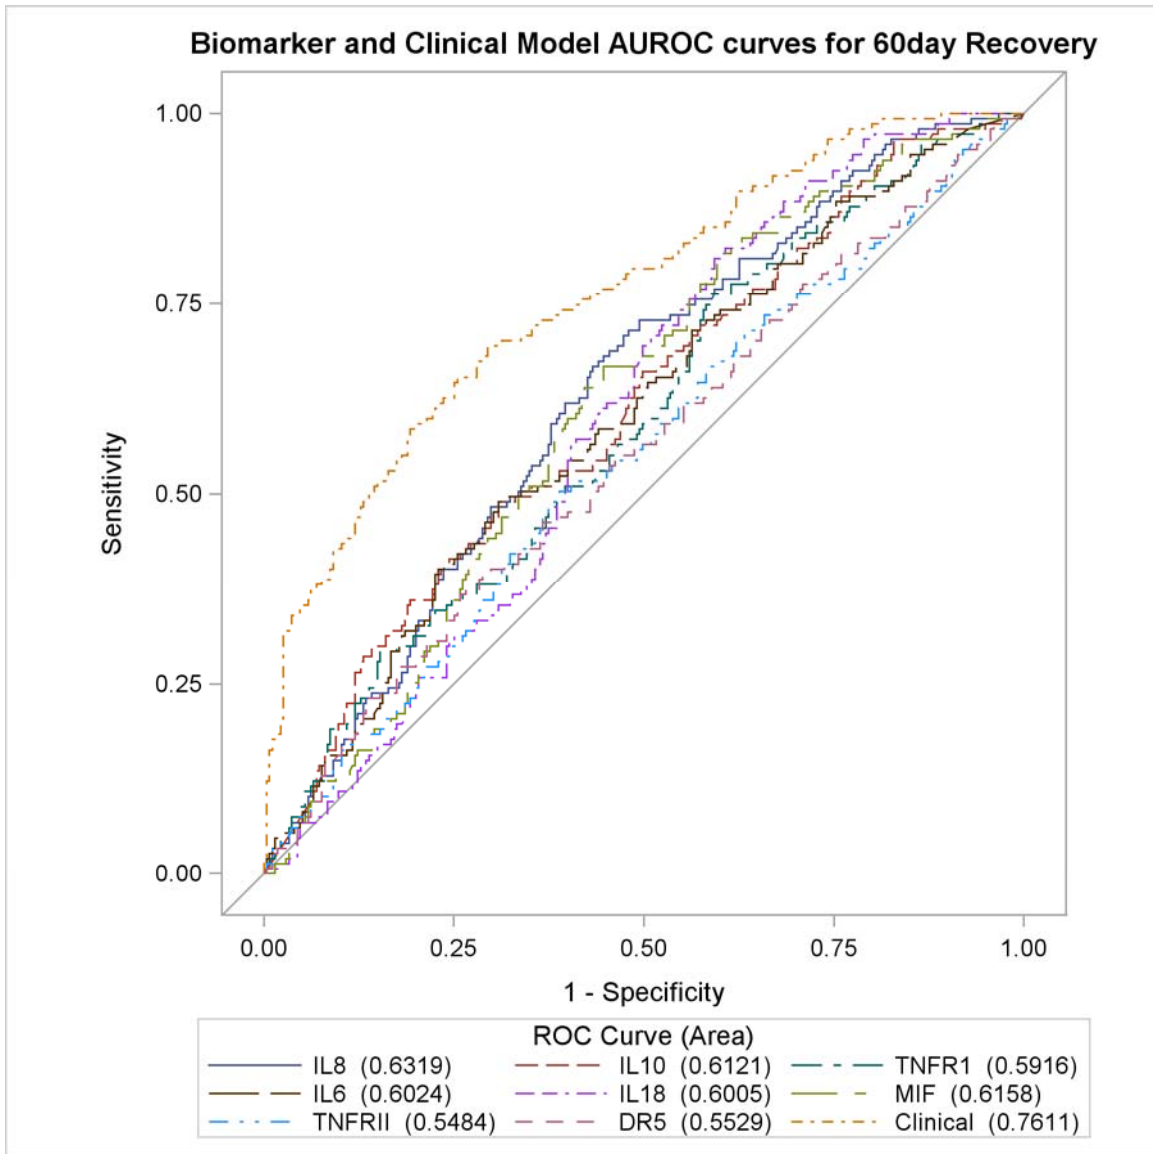

eFigure 2

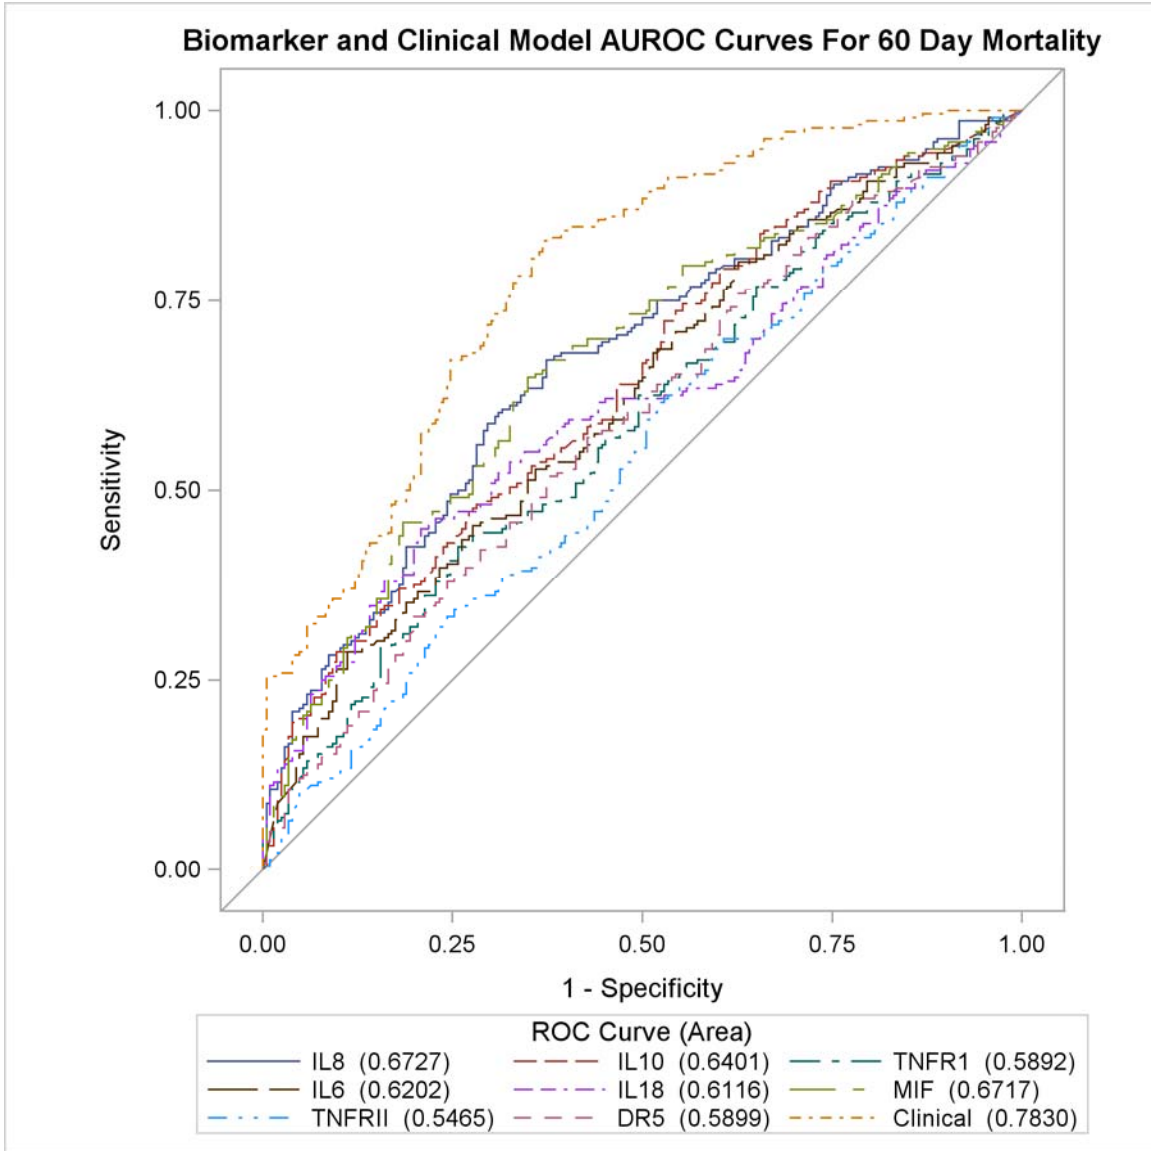

eFigure 3

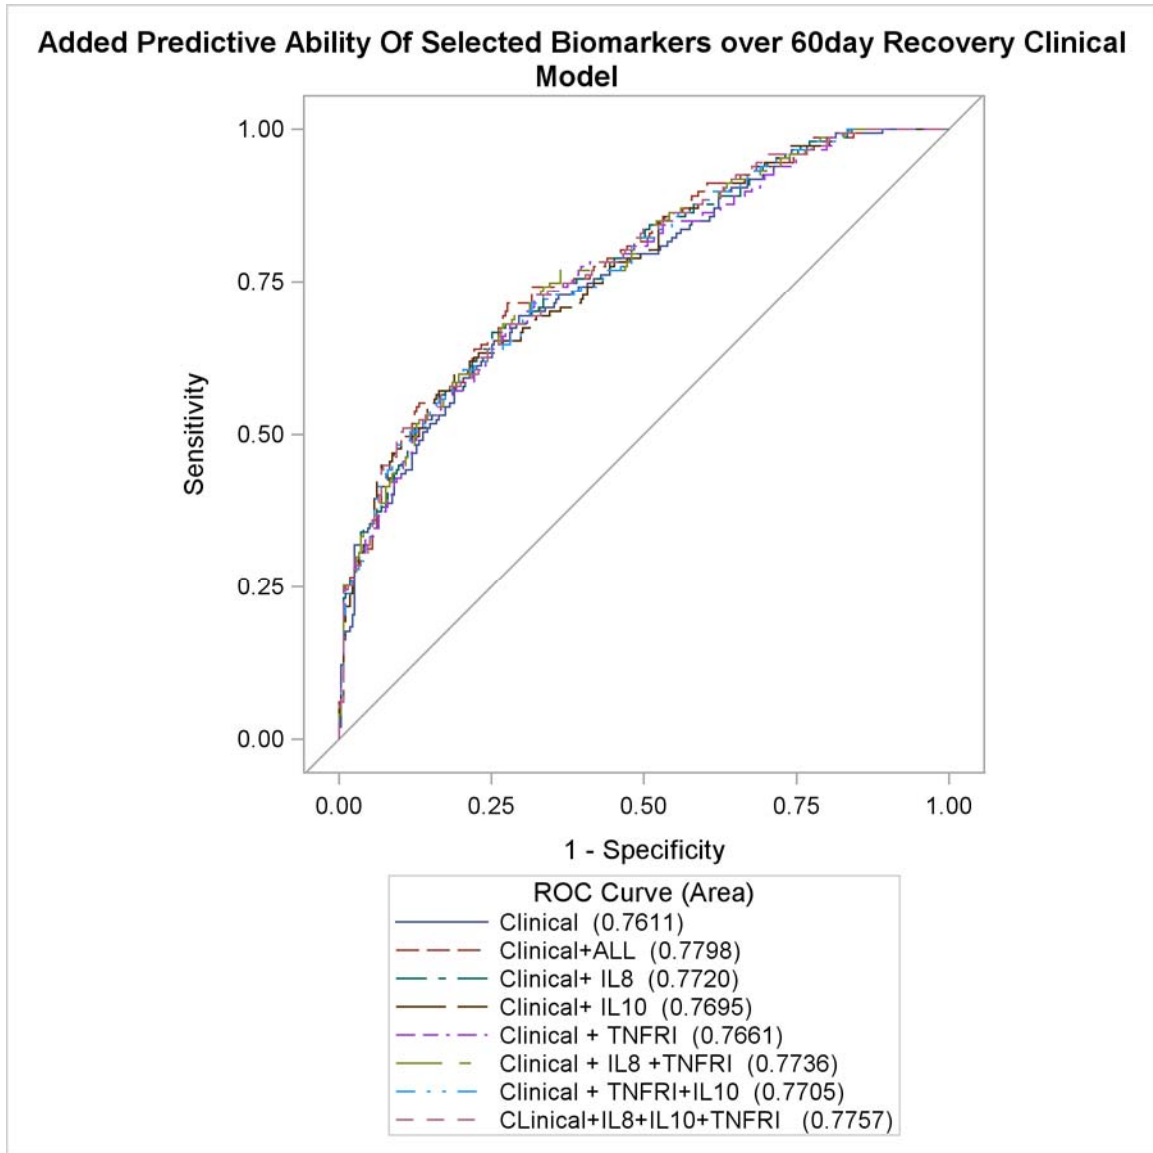



eFigure 4

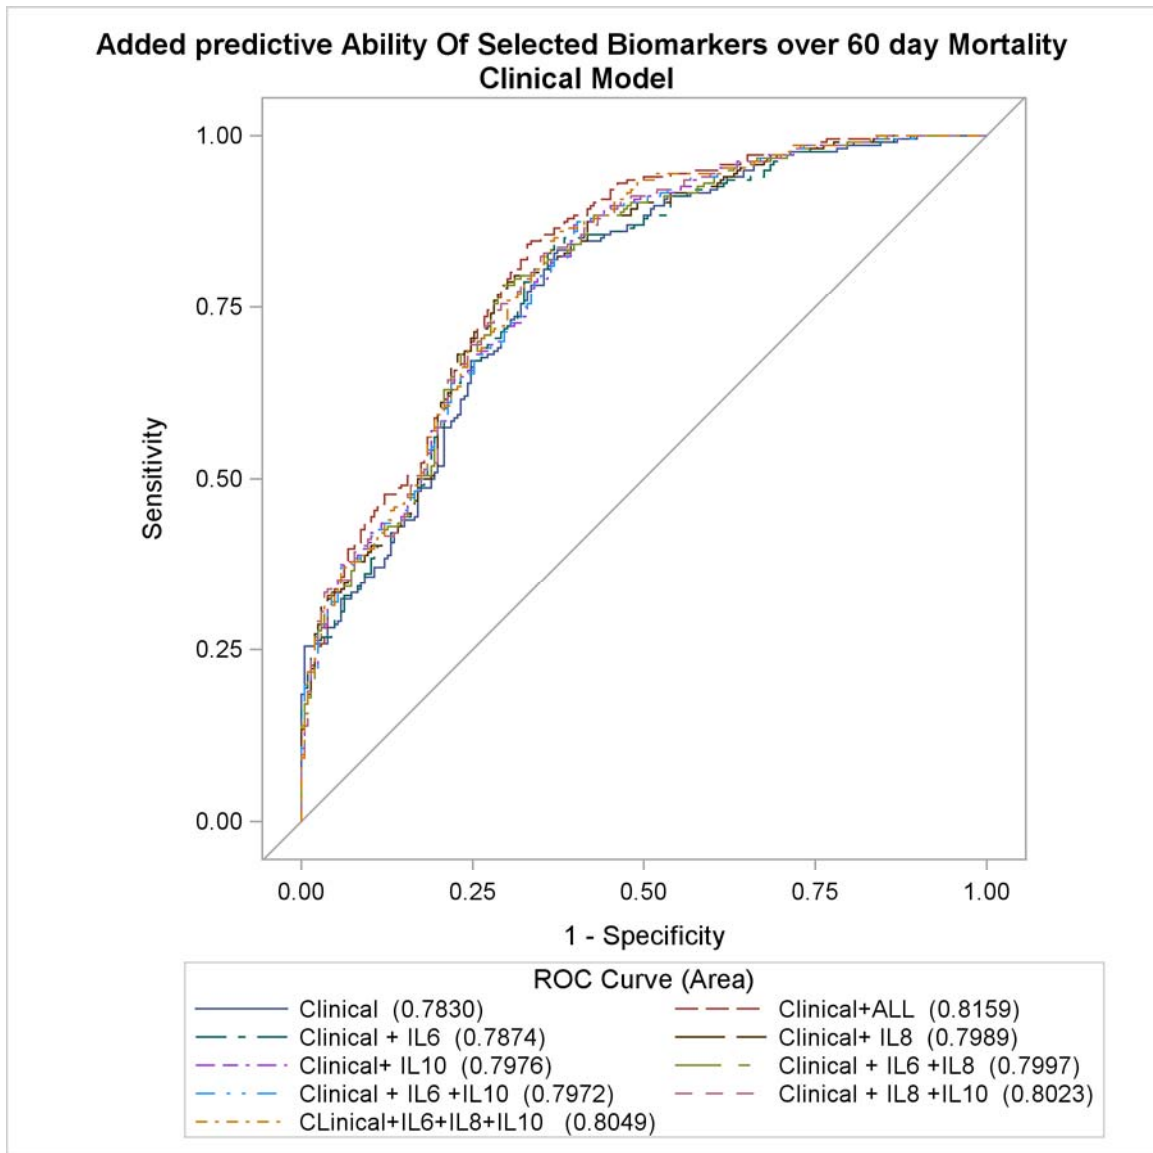

### **Item S1: Biomarker Assay**

Interleukin-6, IL-8, IL-10, IL-1 $\beta$ , TNF, GM-CSF, TNFR-I, TNFR-II, and DR-5 were assayed utilizing Life Technologies Invitrogen™ Luminex® assays (Grand Island NY, USA). Plasma MIF and IL-18 were assayed utilizing Bio-Rad Bio-Plex® Luminex® assays (Hercules CA, USA). All assays were measured on the Bio-Rad Bio-Plex® 200 System with Bio-Plex Manager™ 4.0 software.
